# Supplementary material
Source: MDPI journal article supplement (https://www.mdpi.com/2073-4344/11/10/1176)
Supplement: s1 [file s1]

## Supporting Information

Covalently bonded Ir(IV) on conducted blue TiO<sub>2</sub> for efficient electrocatalytic oxygen evolution reaction in acidic media

Chau T. K. Nguyen<sup>a,b,†</sup>, Ngoc Quang Tran<sup>a,†</sup>, Thi Anh Le<sup>a,b</sup>, Hyoyoung Lee<sup>a,b,c,d\*</sup>

<sup>a</sup> *Center for Integrated Nanostructure Physics, Institute for Basic Science (IBS), Sungkyunkwan University, Suwon 440-746, Republic of Korea*

<sup>b</sup> *Department of Chemistry, Sungkyunkwan University, Suwon 440-746, Republic of Korea*

<sup>c</sup> *Department of Biophysics, Sungkyunkwan University, Suwon 440-746, Republic of Korea*

<sup>d</sup> *Creative Research Institute, Sungkyunkwan University, Suwon 440-746, Republic of Korea*

<sup>†</sup> *Contribute equally to this work.*

<sup>\*</sup> *Corresponding author. Email: [hyoyoung@skku.edu](mailto:hyoyoung@skku.edu)*

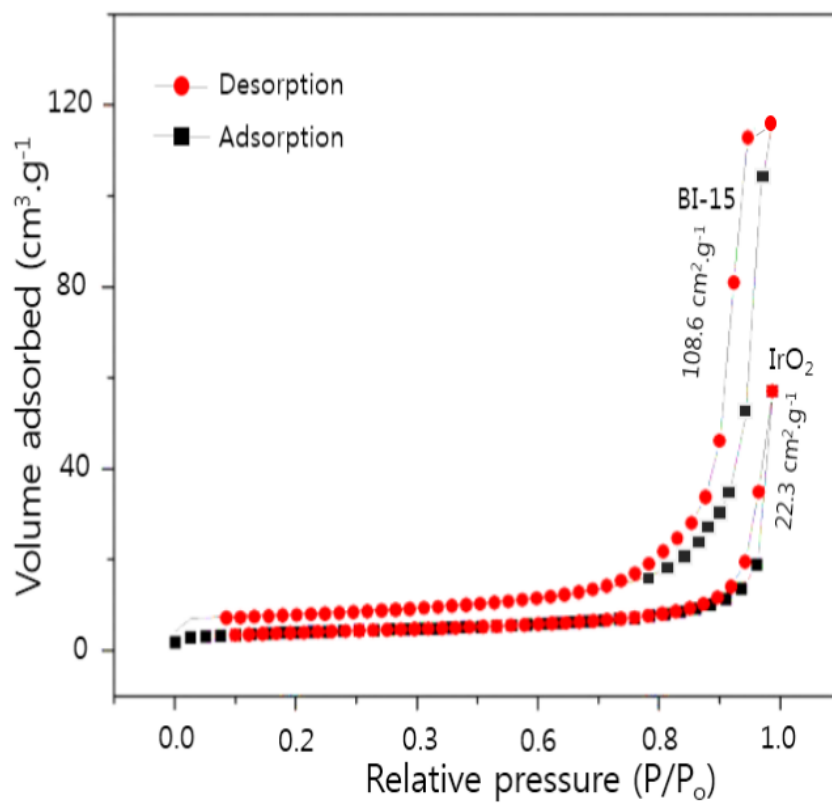

**Figure. S1.** The Brunauer-Emmett-Teller (BET) surface area of  $\text{IrO}_2$  and BI-15 samples.

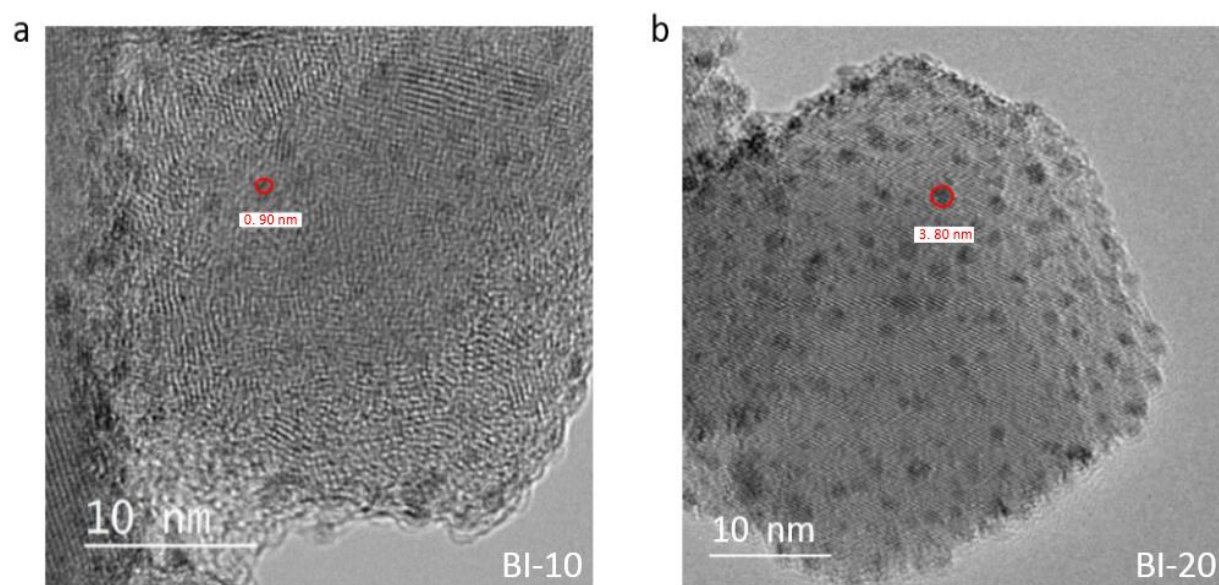

**Figure. S2.** TEM images showed a different size of IrO<sub>2</sub> on the BI-10 and BI-20 samples.

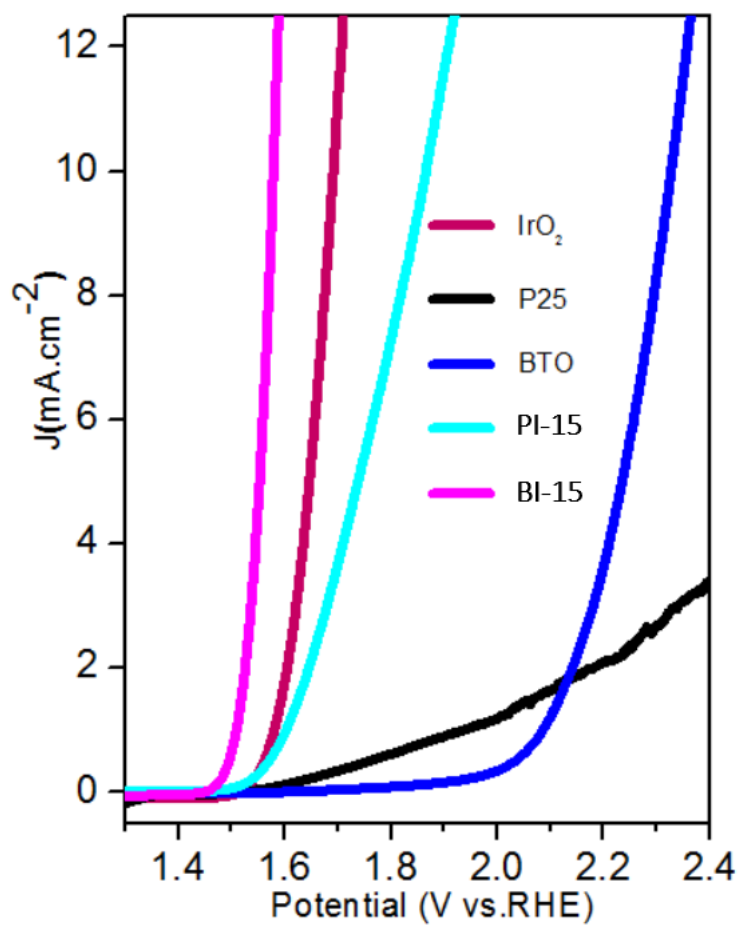

**Figure. S3.** Comparison of LSV curves of P25, BTO,  $\text{IrO}_2$ , PI-15 and BI-15 collected at the scan of  $5 \text{ mV}\cdot\text{s}^{-1}$  in  $0.1 \text{ M HClO}_4$  electrolyte.

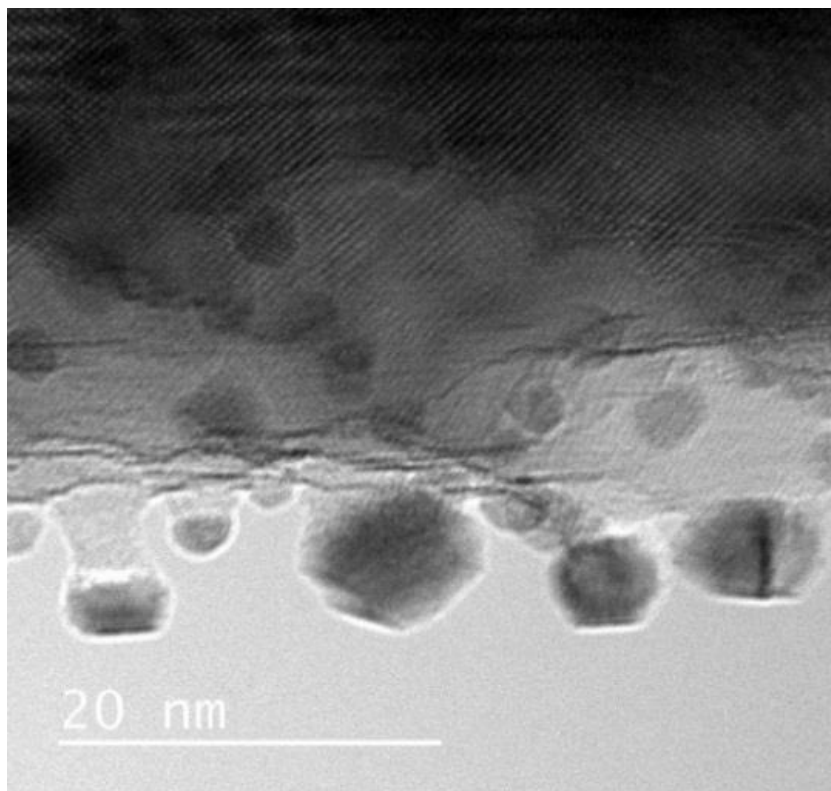

**Figure. S4.** TEM image of BI-15 after 120 min electrocatalytic OER in 0.1 M HClO<sub>4</sub>.

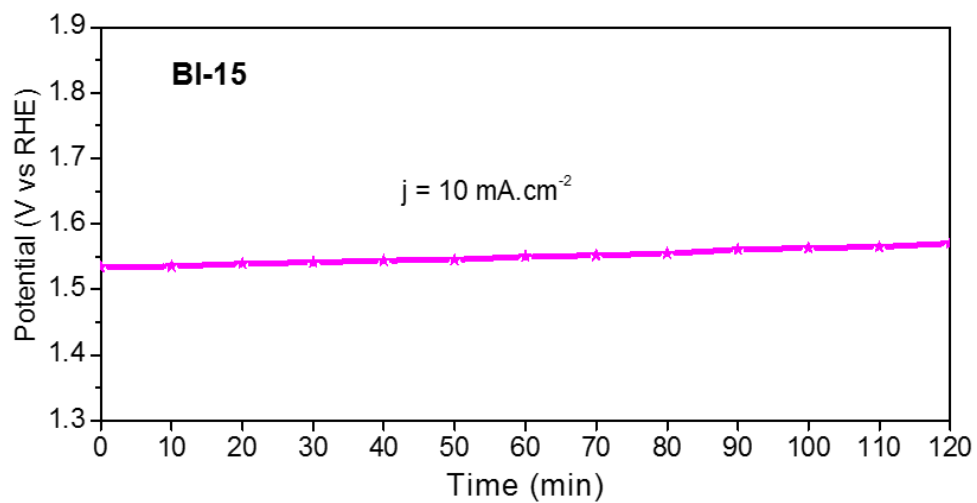

**Figure. S5.** Acid stability test of BI-15 catalyst in 0.1 M HClO<sub>4</sub> electrolyte using chronoamperometry at a potential 1.54 V and a current density of 10 mA·cm<sup>-2</sup>.
